# Supplementary material for: Preparation and bifunctional properties of the A-site-deficient SrTi0.3Fe0.6Ni0.1O3−δ perovskite
Source: Royal Society of Chemistry journal article supplement (doi:10.1039/d2ra07014f), 2022-01-01
Supplement: d2ra07014f1.pdf [file d2ra07014f1.pdf]

## Supporting Information

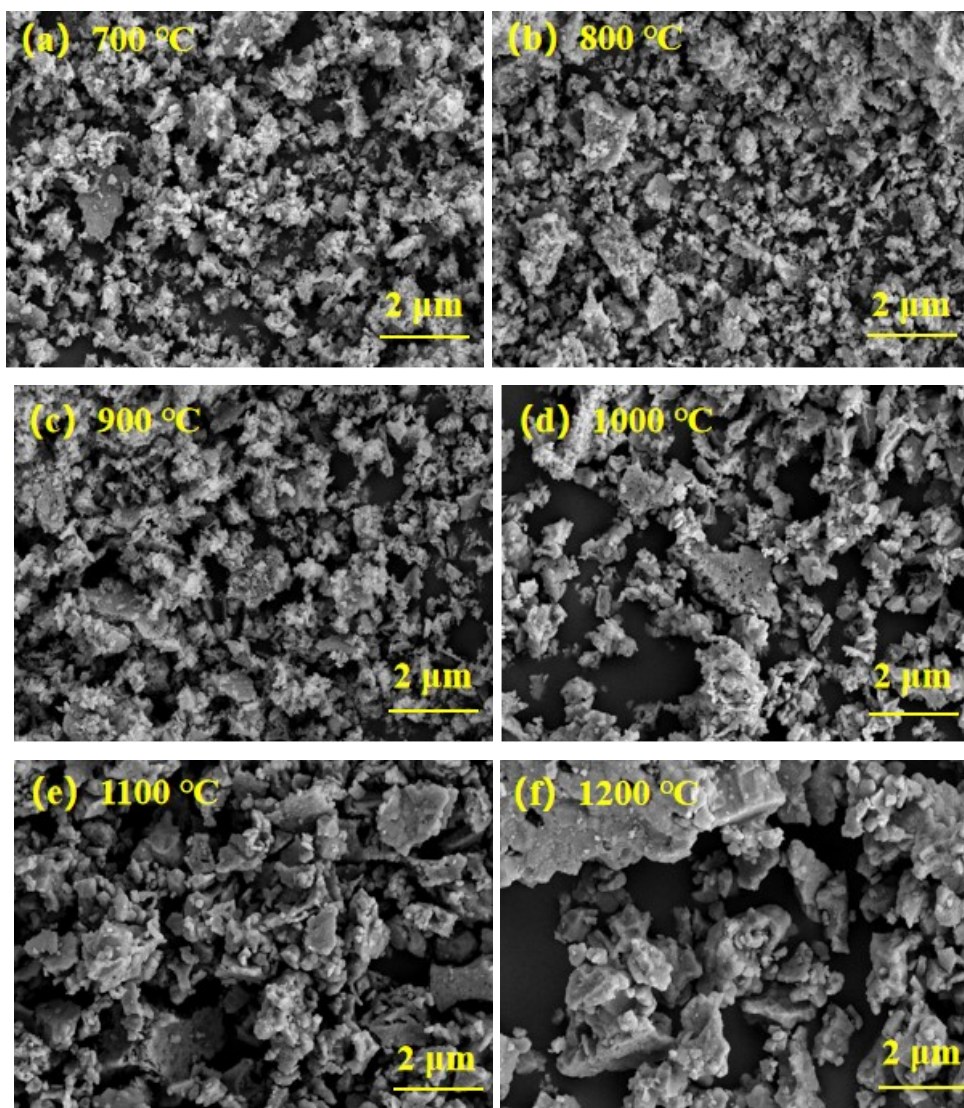

**Fig S1** (a) - (f) SEM of the STF samples at different calcination temperatures

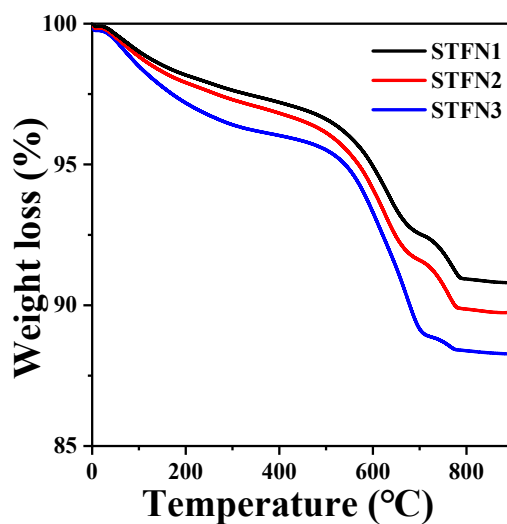

**Fig S2** TGA of S<sub>1-x</sub>TFN with an A-site vacancy**Table S1** Comparison of pore size and specific surface area of STFN at different calcination temperatures

| Catalysts | Surface area<br>(m <sup>2</sup> /g) | Pore volume<br>(cm <sup>3</sup> /g) | Pore width<br>(nm) |
|-----------|-------------------------------------|-------------------------------------|--------------------|
| STFN-700  | 32.839                              | 0.104                               | 3.828              |
| STFN-800  | 33.933                              | 0.050                               | 3.939              |
| STFN-900  | 25.549                              | 0.047                               | 3.806              |
| STFN-1000 | 17.106                              | 0.021                               | 3.677              |
| STFN-1100 | 8.404                               | 0.012                               | 3.539              |
| STFN-1200 | 6.001                               | 0.007                               | 3.420              |

**Table S2** ORR performance of sample STFN at different calcination temperatures

| Catalysts | E <sub>onset</sub><br>(V vs. RHE) | E <sub>1/2</sub><br>(V vs. RHE) | J<br>(mA cm <sup>-2</sup> ) | Tafel<br>(mV dec <sup>-1</sup> ) |
|-----------|-----------------------------------|---------------------------------|-----------------------------|----------------------------------|
| STFN-700  | 0.8843                            | 0.6151                          | -5.8040                     | 106                              |
| STFN-800  | 0.8857                            | 0.6411                          | -6.1971                     | 103                              |
| STFN-900  | 0.8821                            | 0.5961                          | -5.5891                     | 123                              |
| STFN-1000 | 0.8812                            | 0.5678                          | -5.3766                     | 126                              |
| STFN-1100 | 0.8793                            | 0.5318                          | -5.1958                     | 129                              |
| STFN-1200 | 0.8762                            | 0.5221                          | -4.0324                     | 140                              |

**Table S3** OER performance and ΔE of STFN calcined at different temperatures

| Catalysts | OER                              |           |                                | ORR                            |        | ΔE<br>(V) |
|-----------|----------------------------------|-----------|--------------------------------|--------------------------------|--------|-----------|
|           | Tafel<br>(mV dec <sup>-1</sup> ) | η<br>(mV) | @10 mA cm <sup>-2</sup><br>(V) | @-3 mA cm <sup>-2</sup><br>(V) |        |           |
| STFN-700  | 127                              | 450.6     | 1.6806                         | 0.6001                         | 1.0805 |           |
| STFN-800  | 103                              | 412.0     | 1.6420                         | 0.6124                         | 1.0296 |           |
| STFN-900  | 136                              | 463.3     | 1.6933                         | 0.5972                         | 1.0961 |           |
| STFN-1000 | 153                              | 526.3     | 1.7563                         | 0.5815                         | 1.1748 |           |
| STFN-1100 | 159                              | 553.3     | 1.7833                         | 0.5279                         | 1.2554 |           |

|           |     |       |        |        |        |
|-----------|-----|-------|--------|--------|--------|
| STFN-1200 | 211 | 568.3 | 1.7983 | 0.5128 | 1.2855 |
|-----------|-----|-------|--------|--------|--------|

**Table S4** A-site-deficient STFNN pore size and specific surface area data comparison

| Catalysts | Surface area<br>( $\text{m}^2/\text{g}$ ) | Pore volume<br>( $\text{cm}^3/\text{g}$ ) | Pore width<br>(nm) |
|-----------|-------------------------------------------|-------------------------------------------|--------------------|
| STFN1     | 32.839                                    | 0.104                                     | 3.828              |
| STFN2     | 34.957                                    | 0.112                                     | 3.941              |
| STFN3     | 36.828                                    | 0.153                                     | 4.154              |

**Table S5** Oxygen species content of STFNN1 and STFNN3

| Catalyst | $\text{H}_2\text{O}$<br>(%) | $-\text{OH}/\text{O}_2$<br>(%) | $\text{O}_2^{2-}/\text{O}^-$<br>(%) | $\text{O}_{\text{latt}}$<br>(%) |
|----------|-----------------------------|--------------------------------|-------------------------------------|---------------------------------|
| STFN1    | 11.28                       | 32.34                          | 35.37                               | 21.01                           |
| STFN3    | 1.49                        | 41.96                          | 42.91                               | 13.64                           |

**Table S6** Fe and Ni contents in STFNN1 and STFNN3

| Catalyst | $\text{Fe}^{4+}$<br>(%) | $\text{Fe}^{3+}$<br>(%) | $\text{Ni}^{3+}$<br>(%) | $\text{Ni}^{2+}$<br>(%) |
|----------|-------------------------|-------------------------|-------------------------|-------------------------|
| STFN1    | 30.37                   | 69.63                   | 60.96                   | 39.04                   |
| STFN3    | 40.08                   | 59.92                   | 64.42                   | 35.58                   |

**Table S7** ORR performance of A-site-deficient STFNN samples

| Catalysts | $E_{\text{onset}}$<br>(V) | $E_{1/2}$<br>(V) | J<br>( $\text{mA cm}^{-2}$ ) | Tafel<br>( $\text{mV dec}^{-1}$ ) |
|-----------|---------------------------|------------------|------------------------------|-----------------------------------|
| STFN1     | 0.8857                    | 0.6411           | -6.1971                      | 103                               |
| STFN2     | 0.8912                    | 0.6679           | -6.5671                      | 98                                |
| STFN3     | 0.8934                    | 0.6740           | -6.9762                      | 97                                |

**Table S8** OER performance and  $\Delta E$  of A-site-deficient STFNN samples

| Catalysts | OER                              |                | ORR                            |                                | $\Delta E$<br>(V) |
|-----------|----------------------------------|----------------|--------------------------------|--------------------------------|-------------------|
|           | Tafel<br>(mV dec <sup>-1</sup> ) | $\eta$<br>(mV) | @10 mA cm <sup>-2</sup><br>(V) | @-3 mA cm <sup>-2</sup><br>(V) |                   |
| STFN1     | 103                              | 412.0          | 1.6420                         | 0.6124                         | 1.0296            |
| STFN2     | 100                              | 408            | 1.6380                         | 0.6345                         | 1.0335            |
| STFN3     | 99                               | 399.9          | 1.6299                         | 0.7082                         | 0.9217            |

**Table S9** A comparison of ORR and OER activity for STFNN3 and other reported perovskite catalysts. All the electrochemical measurements were carried out in 0.1 M KOH solution

| Catalyst                                                                                                                      | ORR                      |                                  | OER                              |                                        | $\Delta E$<br>(V) | Ref.      |
|-------------------------------------------------------------------------------------------------------------------------------|--------------------------|----------------------------------|----------------------------------|----------------------------------------|-------------------|-----------|
|                                                                                                                               | $E_{1/2}$<br>(V vs. RHE) | Tafel<br>(mV dec <sup>-1</sup> ) | Tafel<br>(mV dec <sup>-1</sup> ) | $\eta$ (mV)<br>@10 mA cm <sup>-2</sup> |                   |           |
| (La <sub>0.8</sub> Sr <sub>0.2</sub> ) <sub>0.95</sub> Mn <sub>0.5</sub> Fe <sub>0.5</sub> O <sub>3-<math>\delta</math></sub> | -0.124                   | 132                              | 230                              | -                                      | -                 | [1]       |
| Ba <sub>0.5</sub> Sr <sub>0.5</sub> Co <sub>0.8</sub> Fe <sub>0.2</sub> O <sub>3-<math>\delta</math></sub>                    | -                        | -                                | -                                | 380                                    | -                 | [2]       |
| Ba <sub>0.5</sub> Sr <sub>0.5</sub> Co <sub>0.8</sub> Fe <sub>0.2</sub> O <sub>3-<math>\delta</math></sub>                    | -                        | -                                | 94                               | 510                                    | -                 | [3]       |
| La <sub>0.8</sub> Sr <sub>0.2</sub> Co <sub>0.4</sub> Mn <sub>0.6</sub> O <sub>3-<math>\delta</math></sub>                    | 0.888                    | 90                               | 113                              | 506                                    | 1.032             | [4]       |
| La <sub>0.8</sub> Sr <sub>0.2</sub> Co <sub>0.6</sub> Mn <sub>0.4</sub> O <sub>3-<math>\delta</math></sub>                    | 0.881                    | 104                              | 113                              | 515                                    | 1.104             | [4]       |
| Sr <sub>0.95</sub> Nb <sub>0.1</sub> Co <sub>0.7</sub> Fe <sub>0.2</sub> O <sub>3-<math>\delta</math></sub>                   | -                        | -                                | 70                               | 420                                    | -                 | [5]       |
| La <sub>0.7</sub> Sr <sub>0.15</sub> Pd <sub>0.15</sub> MnO <sub>3-<math>\delta</math></sub>                                  | 0.973                    | 87                               | -                                | -                                      | -                 | [6]       |
| La <sub>0.9</sub> Y <sub>0.1</sub> MnO <sub>3-<math>\delta</math></sub>                                                       | 0.909                    | 101                              | -                                | -                                      | -                 | [7]       |
| La <sub>1.7</sub> Sr <sub>0.3</sub> Co <sub>0.5</sub> Ni <sub>0.5</sub> O <sub>4+<math>\delta</math></sub>                    | 0.696                    | -                                | 125                              | 592                                    | 1.126             | [8]       |
| La <sub>0.4</sub> Sr <sub>0.6</sub> Co <sub>0.7</sub> Fe <sub>0.2</sub> Nb <sub>0.1</sub> O <sub>3-<math>\delta</math></sub>  | 0.505                    | 114                              | 78                               | 360                                    | 1.07              | [9]       |
| BaZr <sub>0.15</sub> Fe <sub>0.85</sub> O <sub>3-<math>\delta</math></sub>                                                    | -                        | -                                | 97                               | 471                                    | -                 | [10]      |
| IrO <sub>2</sub>                                                                                                              | -                        | -                                | 115                              | 413                                    | -                 | This work |
| Pt/C                                                                                                                          | 0.7054                   | 99                               | -                                | -                                      | -                 | This work |
| Sr <sub>0.9</sub> Ti <sub>0.3</sub> Fe <sub>0.6</sub> Ni <sub>0.1</sub> O <sub>3-<math>\delta</math></sub>                    | 0.7082                   | 97                               | 99                               | 399.9                                  | 0.9217            | This work |

---

## References

- [1] R-H Yuan, Y He, W He, et al. Bifunctional electrocatalytic activity of  $\text{La}_{0.8}\text{Sr}_{0.2}\text{MnO}_3$ -based perovskite with the A-site deficiency for oxygen reduction and evolution reactions in alkaline media[J]. *Applied Energy*, 2019, 251:113406.
- [2] G Li, S Hou, L Gui, et al. Carbon quantum dots decorated  $\text{Ba}_{0.5}\text{Sr}_{0.5}\text{Co}_{0.8}\text{Fe}_{0.2}\text{O}_{3-\delta}$  perovskite nanofibers for boosting oxygen evolution reaction[J]. *Applied Catalysis B: Environmental*, 2019, 257:117919.
- [3] Y Bu, O Gwon, G Nam, et al. A Highly Efficient and Robust Cation Ordered Perovskite Oxide as a Bifunctional Catalyst for Rechargeable Zinc-Air Batteries[J]. *ACS Nano*, 2017, 11(11): 11594-11601.
- [4] Q Wang, Y Xue, S Sun, et al.  $\text{La}_{0.8}\text{Sr}_{0.2}\text{Co}_{1-x}\text{Mn}_x\text{O}_3$  perovskites as efficient bi-functional cathode catalysts for rechargeable zinc-air batteries[J]. *Electrochimica Acta*, 2017, 254: 14-24.
- [5] H Liu, X Ding, L Wang, et al. Cation deficiency design: A simple and efficient strategy for promoting oxygen evolution reaction activity of perovskite electrocatalyst[J]. *Electrochimica Acta*, 2018, 259: 1004-1010.
- [6] Y Xue, S Sun, Q Wang, et al.  $\text{La}_{0.7}(\text{Sr}_{0.3-x}\text{Pd}_x)\text{MnO}_3$  as a highly efficient electrocatalyst for oxygen reduction reaction in aluminum air battery[J]. *Electrochimica Acta*, 2017, 230: 418-427.
- [7] H Miao, Z Wang, Q Wang, et al. A new family of Mn-based perovskite ( $\text{La}_{1-x}\text{Y}_x\text{MnO}_3$ ) with improved oxygen electrocatalytic activity for metal-air batteries[J]. *Energy*, 2018, 154: 561-570.
- [8] P Li, B Wei, Z Lü, et al.  $\text{La}_{1.7}\text{Sr}_{0.3}\text{Co}_{0.5}\text{Ni}_{0.5}\text{O}_{4+\delta}$  layered perovskite as an efficient bifunctional electrocatalyst for rechargeable zinc-air batteries[J]. *Applied Surface Science*, 2019, 464: 494-501.
- [9] L Yu, N Xu, T Zhu, et al.  $\text{La}_{0.4}\text{Sr}_{0.6}\text{Co}_{0.7}\text{Fe}_{0.2}\text{Nb}_{0.1}\text{O}_{3-\delta}$  perovskite prepared by the sol-gel method with superior performance as a bifunctional oxygen electrocatalyst[J]. *International Journal of Hydrogen Energy*, 2020, 45(55): 30583-30591.
- [10] K Zhu, H Liu, X Li, et al. Oxygen evolution reaction over Fe site of  $\text{BaZr}_x\text{Fe}_{1-x}\text{O}_{3-\delta}$  perovskite oxides, *Electrochim. Acta*, 241 (2017) 433-439.
